# Supplementary material for: Laser-Based 3D Body Scanning Reveals a Higher Prevalence of Abdominal Obesity than Tape Measurements: Results from a Population-Based Sample
Source: MDPI journal article supplement (doi:10.3390/diagnostics13152594), 2023-08-04
Supplement: s1 [file s1]

## **Laser-based 3D body scanning reveals a higher prevalence of abdominal obesity than tape measurements: Results from a population-based sample**

Kosilek RP et al., *Diagnostics* 2023

### **Supplementary material:**

*Table S1: Extended baseline characteristics with group comparisons*

*Table S2: Comparison of tape and 3D body scan measurements*

*Table S3: Bland-Altman plots*

*Table S4: 3D Body scan measurements by gender and metabolic syndrome classification*

*Table S5: Correlation of 3D body scan measurements with metabolic syndrome components*

**Table S1:** Extended baseline characteristics with group comparisons

| Gender                                                                                                                                                                                                | Male: N=160 (45.2%) |                  | Female: N=194 (54.8%) |                   | Comparisons <sup>†</sup>                                                                 |   |   |   |
|-------------------------------------------------------------------------------------------------------------------------------------------------------------------------------------------------------|---------------------|------------------|-----------------------|-------------------|------------------------------------------------------------------------------------------|---|---|---|
| Metabolic syndrome<br>N (%)                                                                                                                                                                           | Yes<br>71 (44.4%)   | No<br>89 (55.6%) | Yes<br>39 (20.1%)     | No<br>155 (79.9%) | * p<0.01                                                                                 |   |   |   |
|                                                                                                                                                                                                       |                     |                  |                       |                   | A                                                                                        | B | C | D |
| Variable                                                                                                                                                                                              | Median / IQR        |                  |                       |                   | Mann-Whitney U Test                                                                      |   |   |   |
| Age (Years)                                                                                                                                                                                           | 49.0 / 19.0         | 41.0 / 20.0      | 54.0 / 17.0           | 44.0 / 18.0       |                                                                                          |   | * | * |
| Body mass index (kg/m <sup>2</sup> )                                                                                                                                                                  | 30.3 / 4.93         | 26.0 / 3.93      | 31.0 / 6.32           | 24.2 / 5.19       |                                                                                          | * | * | * |
| Waist-to-height ratio                                                                                                                                                                                 | 0.58 / 0.06         | 0.50 / 0.07      | 0.58 / 0.07           | 0.46 / 0.08       |                                                                                          | * | * | * |
| Body fat percentage                                                                                                                                                                                   | 25.8 / 6.00         | 21.6 / 5.65      | 38.3 / 6.50           | 30.5 / 10.0       | *                                                                                        | * | * | * |
| HbA1c (%)                                                                                                                                                                                             | 5.30 / 0.60         | 5.10 / 0.50      | 5.30 / 0.90           | 4.90 / 0.70       |                                                                                          |   | * | * |
| Total cholesterol (mmol/l)                                                                                                                                                                            | 5.50 / 1.70         | 5.20 / 1.30      | 5.70 / 1.00           | 5.30 / 1.40       |                                                                                          |   |   |   |
| HDL cholesterol (mmol/l)                                                                                                                                                                              | 1.14 / 0.40         | 1.34 / 0.37      | 1.33 / 0.35           | 1.66 / 0.43       | *                                                                                        | * | * | * |
| LDL cholesterol (mmol/l)                                                                                                                                                                              | 3.50 / 1.12         | 3.20 / 1.28      | 3.57 / 0.87           | 3.16 / 1.11       |                                                                                          |   |   |   |
| Triglycerides (mmol/l)                                                                                                                                                                                | 1.92 / 1.36         | 1.17 / 0.81      | 1.90 / 0.87           | 0.94 / 0.52       |                                                                                          | * | * | * |
| Variable                                                                                                                                                                                              | % / Frequency       |                  |                       |                   | Fisher Exact Test                                                                        |   |   |   |
| Smoking status                                                                                                                                                                                        |                     |                  |                       |                   |                                                                                          |   |   |   |
| Never smoker                                                                                                                                                                                          | 25.4 / 18           | 37.1 / 33        | 41.0 / 16             | 35.5 / 55         |                                                                                          |   |   |   |
| Former smoker                                                                                                                                                                                         | 45.1 / 32           | 28.1 / 25        | 33.3 / 13             | 33.6 / 52         |                                                                                          |   |   |   |
| Current smoker                                                                                                                                                                                        | 29.6 / 21           | 34.8 / 31        | 25.6 / 10             | 31.0 / 48         |                                                                                          |   |   |   |
| Obesity                                                                                                                                                                                               |                     |                  |                       |                   |                                                                                          | * | * | * |
| BMI < 25 kg/m <sup>2</sup>                                                                                                                                                                            | 4.2 / 3             | 36.0 / 32        | 10.3 / 4              | 59.4 / 92         |                                                                                          |   |   |   |
| BMI 25 - 29 kg/m <sup>2</sup>                                                                                                                                                                         | 45.1 / 32           | 55.1 / 49        | 33.3 / 13             | 29.0 / 45         |                                                                                          |   |   |   |
| BMI 30 - 34 kg/m <sup>2</sup>                                                                                                                                                                         | 38.0 / 27           | 9.0 / 8          | 35.9 / 14             | 11.0 / 17         |                                                                                          |   |   |   |
| BMI > 35 kg/m <sup>2</sup>                                                                                                                                                                            | 12.7 / 9            | 0.0 / 0          | 20.5 / 8              | 0.7 / 1           |                                                                                          |   |   |   |
| Metabolic syndrome <sup>‡</sup>                                                                                                                                                                       |                     |                  |                       |                   |                                                                                          |   |   |   |
| Abdominal obesity                                                                                                                                                                                     | 90.1 / 64           | 29.2 / 26        | 97.4 / 38             | 38.1 / 59         |                                                                                          |   | * | * |
| Elevated glucose                                                                                                                                                                                      | 74.7 / 53           | 13.5 / 12        | 48.7 / 19             | 5.8 / 9           |                                                                                          |   | * | * |
| Low HDL cholesterol                                                                                                                                                                                   | 40.9 / 29           | 6.7 / 6          | 61.5 / 24             | 14.2 / 22         |                                                                                          |   | * | * |
| Elevated triglycerides                                                                                                                                                                                | 62.0 / 44           | 21.4 / 19        | 64.1 / 25             | 7.1 / 11          |                                                                                          | * | * | * |
| Hypertension                                                                                                                                                                                          | 97.2 / 69           | 50.6 / 45        | 84.6 / 33             | 19.4 / 30         |                                                                                          | * | * | * |
| <sup>†</sup> Bonferroni correction for five comparisons. Overall comparison by gender omitted.<br><sup>‡</sup> According to the harmonized IDF diagnostic criteria (Alberti et al., Circulation 2009) |                     |                  |                       |                   | A: MetS (Y) by gender<br>B: MetS (N) by gender<br>C: Males by MetS<br>D: Females by MetS |   |   |   |

**Table S2:** Comparison of tape and 3D body scan measurements

|                       | Manual measurements |             | Body scan measurements |              | Delta <sup>†</sup> |            | Correlation <sup>‡</sup> |       |       |
|-----------------------|---------------------|-------------|------------------------|--------------|--------------------|------------|--------------------------|-------|-------|
| Variable              | Median / IQR        |             | Median / IQR           |              | Median / IQR       |            | Pearson's <i>r</i>       |       |       |
|                       | M                   | F           | M                      |              | M                  | F          | M                        | F     |       |
| Height                | 179.0 / 8.0         | 165.0 / 9.0 | 179.3 / 9.0            |              | 165.2 / 8.3        | 0.3 / 1.8  | 0.6 / 1.1                | 0.990 | 0.990 |
| Weight                | 87.3 / 18.7         | 68.4 / 16.8 | 87.0 / 18.2            |              | 68.1 / 16.6        | -0.2 / 0.5 | -0.2 / 0.5               | 0.999 | 0.999 |
| Right upper arm circ. | 31.0 / 4.0          | 28.0 / 4.6  | 31.7 / 3.2             |              | 28.7 / 3.8         | 0.9 / 2.2  | 1.0 / 2.0                | 0.801 | 0.896 |
| Waist circumference   | 95.5 / 14.7         | 80.1 / 16.9 | a                      | 98.4 / 15.6  | 82.6 / 17.6        | 2.8 / 3.4  | 3.1 / 3.4                | 0.968 | 0.975 |
|                       |                     |             | b                      | 98.9 / 16.6  | 85.9 / 19.5        | 3.5 / 4.0  | 6.1 / 5.1                | 0.969 | 0.962 |
|                       |                     |             | c                      | 101.0 / 14.5 | 92.9 / 14.6        | 6.0 / 4.5  | 12.0 / 5.0               | 0.953 | 0.938 |
|                       |                     |             | d                      | 101.3 / 14.8 | 93.9 / 14.0        | 6.5 / 4.2  | 13.3 / 4.8               | 0.956 | 0.943 |
| Hip circumference     | 99.1 / 9.3          | 98.5 / 13.9 | e                      | 100.0 / 13.3 | 98.2 / 15.5        | 2.1 / 6.3  | 1.0 / 4.2                | 0.888 | 0.946 |
|                       |                     |             | f                      | 100.5 / 14.9 | 95.3 / 13.5        | 2.3 / 8.4  | -3.4 / 5.5               | 0.862 | 0.914 |
|                       |                     |             | g                      | 105.2 / 8.2  | 105.3 / 13.2       | 6.3 / 4.7  | 7.3 / 5.0                | 0.886 | 0.925 |
|                       |                     |             | h                      | 104.1 / 7.9  | 104.3 / 12.8       | 4.9 / 3.5  | 6.0 / 3.6                | 0.905 | 0.937 |

M: Male subjects (N=160); F: Female subjects (N=194)

All variables measured in centimeter

<sup>†</sup> Difference body scan measurement - manual measurement; sign test (two-sided) significant for all variables at p<0.05

<sup>‡</sup> Pearson's correlation coefficient, pairwise by gender, two-sided, with Bonferroni correction; p<0.05 for all results

a: High waist circumference; b: Waist circumference; c: Belly circumference; d: Maximum belly circumference

e: Middle hip circumference; f: High hip circumference; g: Hip circumference; h: Buttock circumference

**Table S3: Bland-Altman plots**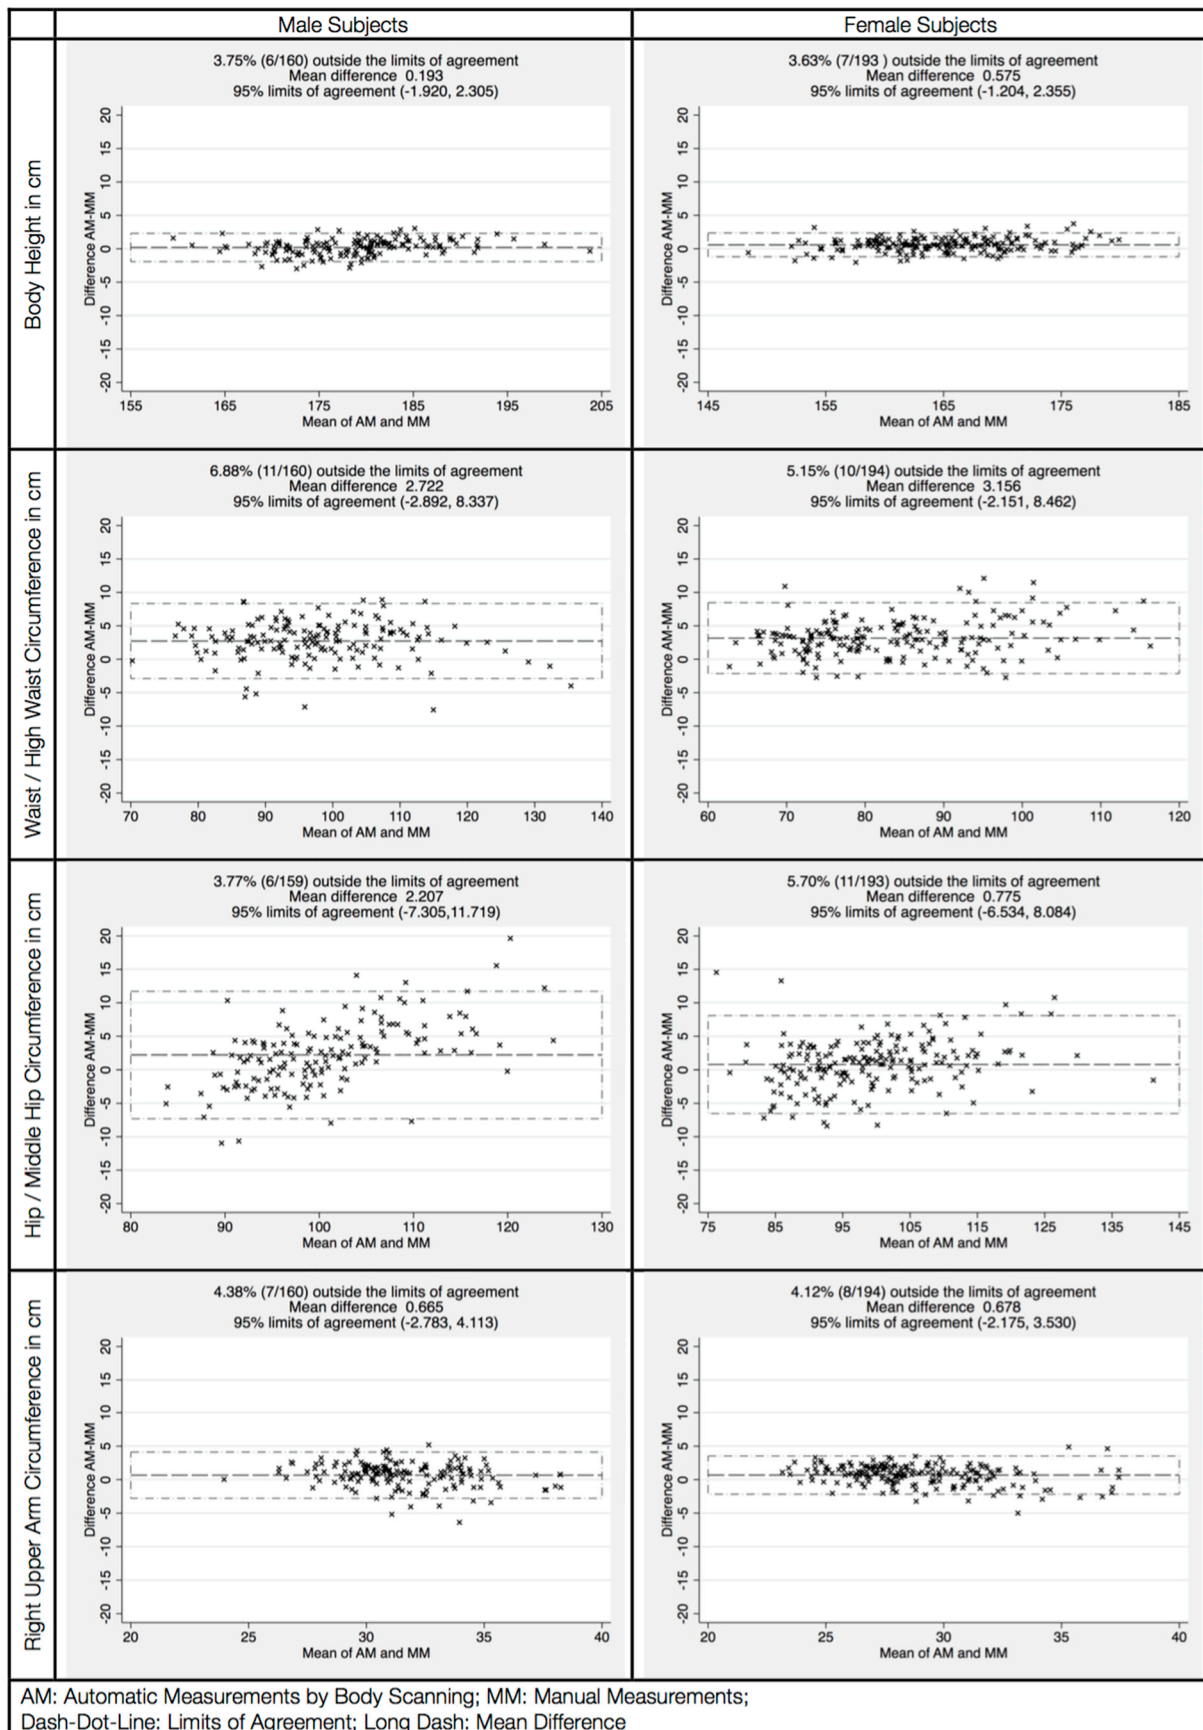

**Table S4:** 3D body scan measurements by gender and metabolic syndrome classification

| Gender                                                                                         | Male: N=160 (45.2%) |                     | Female: N=194 (54.8%) |                     | Comparisons <sup>†</sup> |   |   |   |
|------------------------------------------------------------------------------------------------|---------------------|---------------------|-----------------------|---------------------|--------------------------|---|---|---|
| Metabolic Syndrome<br>N (%)                                                                    | Yes<br>71 (44.4%)   | No<br>89 (55.6%)    | Yes<br>39 (20.1%)     | No<br>155 (79.9%)   | * p<0.01                 |   |   |   |
|                                                                                                |                     |                     |                       |                     | A                        | B | C | D |
| Body scan variable (cm)                                                                        | Median / IQR        |                     |                       |                     | Mann-Whitney U Test      |   |   |   |
| Body height                                                                                    | <b>178.5</b> / 8.7  | <b>179.3</b> / 9.7  | <b>162.7</b> / 7.2    | <b>165.9</b> / 8.0  | *                        | * |   | * |
| Body weight                                                                                    | <b>95.8</b> / 19.4  | <b>82.6</b> / 12.6  | <b>77.8</b> / 24.2    | <b>65.2</b> / 15.2  | *                        | * | * | * |
| Middle neck circumference                                                                      | <b>43.6</b> / 4.5   | <b>40.0</b> / 3.6   | <b>38.2</b> / 4.1     | <b>33.5</b> / 3.2   | *                        | * | * | * |
| Neck diameter (transversal)                                                                    | <b>14.6</b> / 1.5   | <b>13.4</b> / 1.4   | <b>13.0</b> / 1.6     | <b>11.8</b> / 1.3   | *                        | * | * | * |
| Neck circumference at base                                                                     | <b>47.9</b> / 4.9   | <b>44.6</b> / 3.7   | <b>41.6</b> / 3.8     | <b>38.7</b> / 3.3   | *                        | * | * | * |
| Sagittal neck diameter at base                                                                 | <b>13.3</b> / 1.8   | <b>11.5</b> / 1.7   | <b>11.5</b> / 1.5     | <b>9.8</b> / 1.5    | *                        | * | * | * |
| Bust circumference                                                                             | <b>116.1</b> / 12.9 | <b>105.3</b> / 10.4 | <b>113.1</b> / 13.1   | <b>97.5</b> / 13.2  |                          | * | * | * |
| Underbust circumference                                                                        | <b>109.9</b> / 10.6 | <b>98.4</b> / 8.9   | <b>97.4</b> / 13.4    | <b>82.6</b> / 11.1  | *                        | * | * | * |
| Sagittal chest diameter                                                                        | <b>30.5</b> / 3.7   | <b>26.8</b> / 3.2   | <b>31.7</b> / 3.8     | <b>26.5</b> / 4.3   | *                        |   | * | * |
| Total torso circumference                                                                      | <b>184.3</b> / 8.9  | <b>176.9</b> / 9.8  | <b>166.9</b> / 13.3   | <b>161.1</b> / 8.9  | *                        | * | * | * |
| Waist circumference                                                                            | <b>108.1</b> / 13.8 | <b>93.7</b> / 11.7  | <b>101.2</b> / 15.2   | <b>82.3</b> / 16.8  | *                        | * | * | * |
| High waist circumference                                                                       | <b>107.3</b> / 13.2 | <b>92.4</b> / 11.4  | <b>97.3</b> / 15.1    | <b>79.6</b> / 14.2  | *                        | * | * | * |
| Maximum belly circumference                                                                    | <b>109.1</b> / 16.3 | <b>96.7</b> / 9.8   | <b>105.8</b> / 14.3   | <b>91.4</b> / 12.9  |                          | * | * | * |
| SAD                                                                                            | <b>31.4</b> / 5.2   | <b>26.0</b> / 4.3   | <b>30.0</b> / 5.2     | <b>24.1</b> / 4.6   |                          | * | * | * |
| High hip circumference                                                                         | <b>108.0</b> / 15.5 | <b>96.2</b> / 9.0   | <b>105.6</b> / 14.4   | <b>92.1</b> / 13.3  |                          | * | * | * |
| Middle hip circumference                                                                       | <b>106.7</b> / 15.1 | <b>96.4</b> / 8.8   | <b>109.8</b> / 15.2   | <b>95.4</b> / 14.1  |                          |   | * | * |
| Hip circumference                                                                              | <b>107.8</b> / 8.4  | <b>103.3</b> / 6.8  | <b>113.3</b> / 17.1   | <b>104.1</b> / 11.4 |                          |   | * | * |
| Buttock circumference                                                                          | <b>106.6</b> / 8.7  | <b>102.0</b> / 7.3  | <b>113.0</b> / 16.1   | <b>102.2</b> / 11.8 |                          |   | * | * |
| Right upper arm circumference                                                                  | <b>32.6</b> / 3.4   | <b>31.2</b> / 2.9   | <b>31.2</b> / 4.7     | <b>28.4</b> / 3.3   |                          | * | * | * |
| Right upper arm diameter                                                                       | <b>13.8</b> / 1.9   | <b>12.7</b> / 1.7   | <b>12.4</b> / 1.9     | <b>10.6</b> / 1.7   | *                        | * | * | * |
| Right thigh circumference                                                                      | <b>58.7</b> / 5.7   | <b>56.4</b> / 4.5   | <b>58.9</b> / 9.9     | <b>56.7</b> / 5.9   |                          |   |   | * |
| SAD: Sagittal abdominal diameter at maximum belly circumference                                |                     |                     |                       |                     | A: MetS (Y) by gender    |   |   |   |
| <sup>†</sup> Bonferroni correction for five comparisons. Overall comparison by gender omitted. |                     |                     |                       |                     | B: MetS (N) by gender    |   |   |   |
|                                                                                                |                     |                     |                       |                     | C: Males by MetS         |   |   |   |
|                                                                                                |                     |                     |                       |                     | D: Females by MetS       |   |   |   |

**Table S5:** Correlation of 3D body scan measurements with metabolic syndrome components

|                                | Metabolic syndrome          |      | MetS comp. without WC <sup>†</sup> |      | Abdominal obesity <sup>‡</sup> |             | Elevated Glucose |      | Low HDL cholesterol |   | Elevated triglycerides |      | Hypertension |      | Body fat percentage |             |
|--------------------------------|-----------------------------|------|------------------------------------|------|--------------------------------|-------------|------------------|------|---------------------|---|------------------------|------|--------------|------|---------------------|-------------|
|                                | Spearman's rho <sup>§</sup> |      |                                    |      |                                |             |                  |      |                     |   |                        |      |              |      |                     |             |
| Variable                       | M                           | F    | M                                  | F    | M                              | F           | M                | F    | M                   | F | M                      | F    | M            | F    | M                   | F           |
| Body height                    |                             |      |                                    |      |                                |             |                  |      |                     |   |                        |      |              |      |                     |             |
| Body weight                    | 0.48                        | 0.39 | 0.43                               | 0.35 | <b>0.67</b>                    | <b>0.73</b> |                  | 0.32 |                     |   |                        |      | 0.37         | 0.30 | <b>0.67</b>         | <b>0.84</b> |
| Transversal neck diameter      | 0.42                        | 0.39 | 0.41                               | 0.34 | 0.52                           | 0.59        |                  |      |                     |   |                        |      | 0.37         | 0.31 | 0.48                | 0.50        |
| Middle neck circumference      | 0.57                        | 0.50 | 0.51                               | 0.50 | <b>0.66</b>                    | <b>0.75</b> | 0.35             | 0.35 |                     |   |                        |      | 0.45         | 0.44 | <b>0.60</b>         | <b>0.74</b> |
| Neck circumference at base     | 0.49                        | 0.38 | 0.46                               | 0.35 | 0.58                           | <b>0.63</b> |                  |      |                     |   |                        |      | 0.48         | 0.32 | 0.53                | <b>0.64</b> |
| Sagittal neck diameter at base | 0.56                        | 0.47 | 0.50                               | 0.43 | <b>0.62</b>                    | <b>0.68</b> | 0.37             | 0.34 |                     |   |                        | 0.28 | 0.45         | 0.38 | 0.51                | <b>0.69</b> |
| Bust bircumference             | 0.53                        | 0.53 | 0.46                               | 0.50 | <b>0.71</b>                    | <b>0.84</b> |                  | 0.38 |                     |   |                        |      | 0.38         | 0.42 | <b>0.65</b>         | <b>0.86</b> |
| Underbust circumference        | 0.57                        | 0.52 | 0.48                               | 0.50 | <b>0.75</b>                    | <b>0.84</b> |                  | 0.37 | 0.31                |   |                        |      | 0.42         | 0.46 | <b>0.66</b>         | <b>0.84</b> |
| Sagittal chest diameter        | 0.53                        | 0.56 | 0.46                               | 0.53 | <b>0.72</b>                    | <b>0.82</b> |                  | 0.38 |                     |   |                        | 0.30 | 0.41         | 0.45 | <b>0.66</b>         | <b>0.85</b> |
| Total torso circumference      | 0.41                        | 0.34 | 0.40                               | 0.29 | 0.55                           | 0.57        |                  |      |                     |   |                        |      | 0.35         |      | 0.57                | <b>0.68</b> |
| Waist circumference            | <b>0.61</b>                 | 0.51 | 0.51                               | 0.49 | <b>0.82</b>                    | <b>0.84</b> | 0.34             | 0.36 |                     |   |                        | 0.29 | 0.41         | 0.45 | <b>0.74</b>         | <b>0.90</b> |
| High waist circumference       | <b>0.63</b>                 | 0.53 | 0.52                               | 0.52 | <b>0.83</b>                    | <b>0.85</b> | 0.33             | 0.37 |                     |   |                        | 0.29 | 0.43         | 0.48 | <b>0.73</b>         | <b>0.89</b> |
| Maximum belly circumference    | 0.57                        | 0.49 | 0.48                               | 0.49 | <b>0.79</b>                    | <b>0.83</b> | 0.33             | 0.36 |                     |   |                        | 0.28 | 0.40         | 0.44 | <b>0.76</b>         | <b>0.91</b> |
| SAD                            | <b>0.62</b>                 | 0.53 | 0.53                               | 0.53 | <b>0.80</b>                    | <b>0.83</b> | 0.35             | 0.39 |                     |   |                        | 0.31 | 0.42         | 0.47 | <b>0.73</b>         | <b>0.90</b> |
| High hip circumference         | 0.55                        | 0.49 | 0.47                               | 0.49 | <b>0.78</b>                    | <b>0.82</b> | 0.33             | 0.36 |                     |   |                        | 0.29 | 0.38         | 0.43 | <b>0.76</b>         | <b>0.91</b> |
| Middle hip circumference       | 0.53                        | 0.47 | 0.45                               | 0.48 | <b>0.77</b>                    | <b>0.79</b> | 0.32             | 0.35 |                     |   |                        | 0.28 | 0.37         | 0.44 | <b>0.75</b>         | <b>0.91</b> |
| Hip circumference              | 0.35                        | 0.33 |                                    |      | 0.55                           | <b>0.61</b> |                  | 0.29 |                     |   |                        |      |              |      | <b>0.67</b>         | <b>0.82</b> |
| Buttock circumference          | 0.38                        | 0.37 | 0.32                               | 0.33 | <b>0.60</b>                    | <b>0.66</b> |                  | 0.31 |                     |   |                        |      |              | 0.31 | <b>0.68</b>         | <b>0.85</b> |
| Right upper arm circumference  |                             |      |                                    |      | 0.34                           | 0.54        |                  | 0.29 |                     |   |                        |      |              |      | 0.40                | <b>0.66</b> |
| Right upper arm diameter       | 0.32                        | 0.35 |                                    | 0.30 | 0.39                           | <b>0.61</b> |                  |      |                     |   |                        |      |              |      | 0.45                | <b>0.64</b> |
| Right thigh circumference      |                             |      |                                    |      | 0.36                           | 0.48        |                  |      |                     |   |                        |      |              |      | 0.53                | <b>0.68</b> |
| Body mass index                | 0.56                        | 0.49 | 0.48                               | 0.47 | <b>0.73</b>                    | <b>0.78</b> |                  | 0.38 |                     |   |                        |      | 0.39         | 0.39 | <b>0.69</b>         | <b>0.90</b> |
| Waist-to-height ratio          | <b>0.62</b>                 | 0.55 | 0.50                               | 0.56 | <b>0.74</b>                    | <b>0.83</b> | 0.34             | 0.39 |                     |   |                        | 0.32 | 0.41         | 0.50 | <b>0.66</b>         | <b>0.86</b> |
| Waist-to-hip ratio             | 0.40                        | 0.38 | 0.38                               | 0.35 | 0.44                           | 0.56        |                  |      |                     |   |                        |      |              | 0.30 |                     | 0.40        |
| SAD-to-height ratio            | <b>0.63</b>                 | 0.56 | 0.52                               | 0.56 | <b>0.74</b>                    | <b>0.80</b> | 0.36             | 0.41 |                     |   |                        | 0.34 | 0.41         | 0.49 | <b>0.69</b>         | <b>0.87</b> |

M: Male subjects (N=160); F: Female subjects (N=194).

SAD: Sagittal abdominal diameter at maximum belly circumference

<sup>†</sup> Sum of metabolic syndrome components without waist circumference (0-4);

<sup>‡</sup> Manually measured waist circumference greater than 94 cm for males and 80 cm for females

<sup>§</sup> Spearman's rho, calculated by gender with Bonferroni correction, pairwise analysis

p<0.05 for all shown results. statistically insignificant results omitted
